# Supplementary material
Source: PubMed Central journal article supplement (PMC6171099)

YMTHE, Volume 26

## **Supplemental Information**

### **Complement C3-Targeted Gene Therapy Restricts**

### **Onset and Progression of Neurodegeneration**

### **in Chronic Mouse Glaucoma**

**Alejandra Bosco, Sarah R. Anderson, Kevin T. Breen, Cesar O. Romero, Michael R. Steele, Vince A. Chiodo, Sanford L. Boye, William W. Hauswirth, Stephen Tomlinson, and Monica L. Vetter**

**Figure S1. C3d immunostaining specificity.** (A) Confocal image of the GCL/NFL (30  $\mu\text{m}$ -maximal intensity projection) from a naïve Thy1<sup>CFP</sup> DBA/2J retinal wholemount triple-immunostained for C3d, SMI32 and gamma-synuclein (same retina shown in Figure 1F). Arrows point to RGCs showing C3d deposition and co-immunostaining for Thy1, SMI32 and/or  $\gamma$ -synuclein. (B) Confocal image of a retinal wholemount triple-immunostained for C3d, SMI32 and Iba1 (0.3  $\mu\text{m}$  single optical slice). Asterisks indicate C3d-expressing SMI32+  $\alpha$ -RGCs. Crosses indicate C3d-negative Iba1+ microglia.

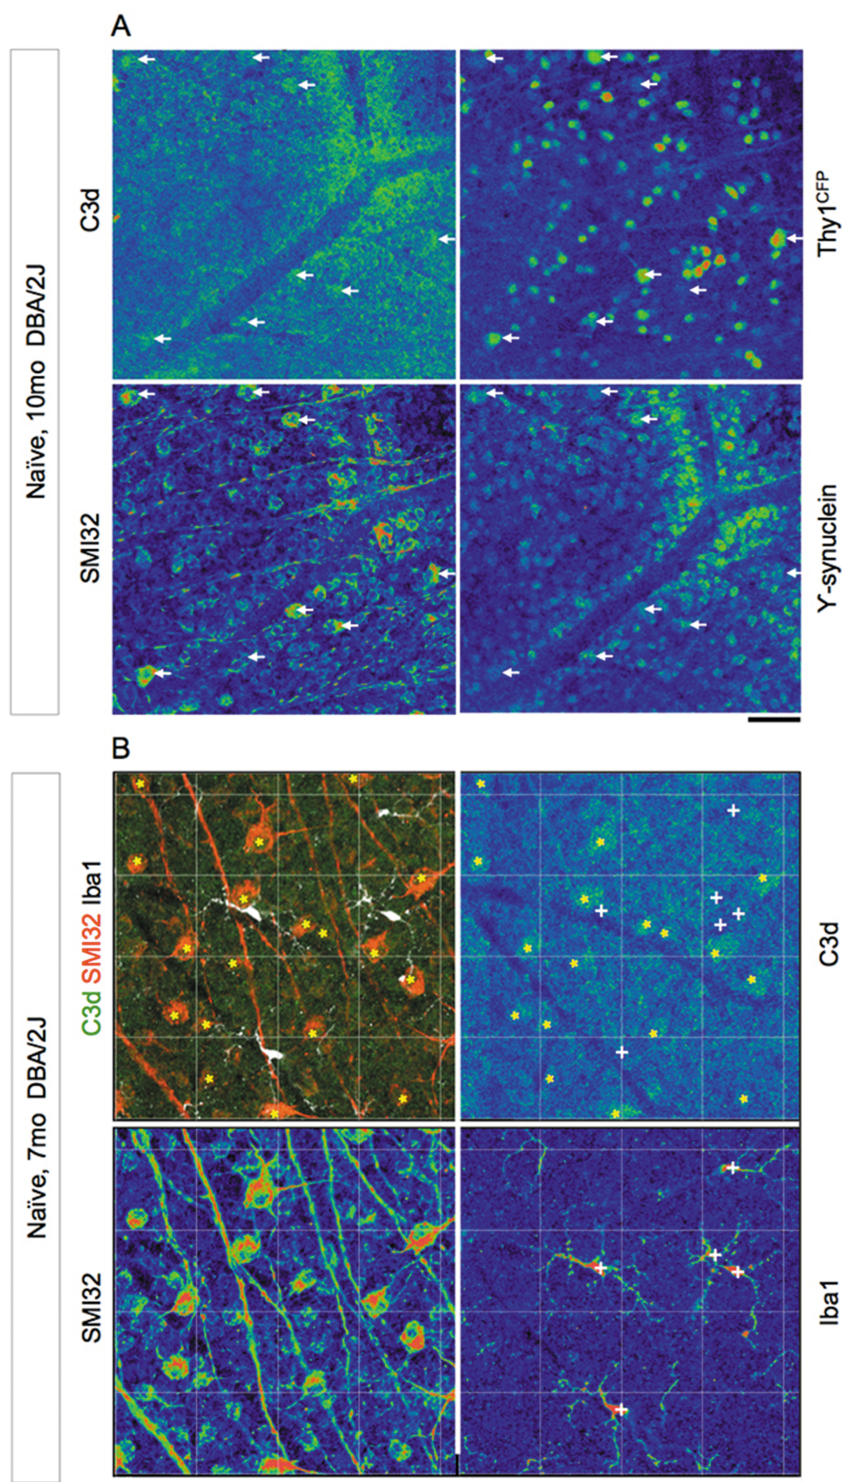

**Figure S2. Intraretinal axon fasciculation.** (A). Confocal image of a retinal wholemount from a non-glaucoma Gpnmb<sup>WT</sup> DBA/2J mouse, immunostained for pNF (maximal intensity projection of 20  $\mu$ m). Scale, 500  $\mu$ m.

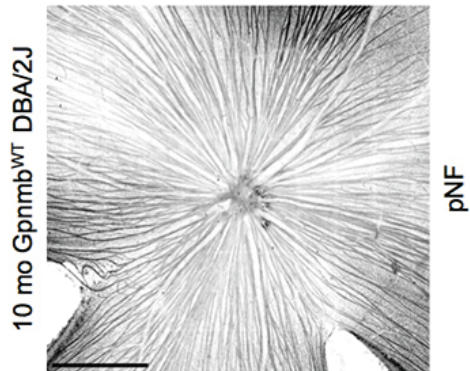

Supplement: mmc1.pdf [file mmc1.pdf]
